# Supplementary material for: Selective molecular tailoring for retarders with achromaticity or a wide field-of-view
Source: Royal Society of Chemistry journal article supplement (doi:10.1039/d5tc04031k), 2025-12-30
Supplement: d5tc04031k1.pdf [file d5tc04031k1.pdf]

## Selective molecular tailoring for retarders with achromaticity or a wide field-of-view

Hansol Lee<sup>1†</sup>, Ja Won Kim<sup>2†</sup>, Dae Hyeon Kwon<sup>3†</sup>, Yi Young Kang<sup>2</sup>, Yumi Cho<sup>4</sup>, Yu-Jin Choi<sup>2</sup>,  
Jae-Won Ka<sup>2,\*</sup>, Sang Kyu Kwak<sup>3,\*</sup>, Ji-Hoon Lee<sup>1,\*</sup>

<sup>1</sup> Division of Electronics Engineering, Jeonbuk National University, Jeonju 54896, Korea

<sup>2</sup> Advanced Functional Polymers Research Center, Korea Research Institute of Chemical Technology, Daejeon 34114, Korea

<sup>3</sup> Department of Chemical and Biological Engineering, Korea University, Seoul 02841, Korea

<sup>4</sup> School of Energy and Chemical Engineering, Ulsan National Institute of Science and Technology (UNIST), Ulsan 44919, Korea

† These authors equally contributed to this paper

\* Authors to whom with correspondence: jwka@kriect.re.kr (J.-W. Ka), skkwak@korea.ac.kr (S. K. Kwak), jihoonlee@jbnu.ac.kr (J.-H. Lee)

## 1. Synthesis conditions of HRM molecules

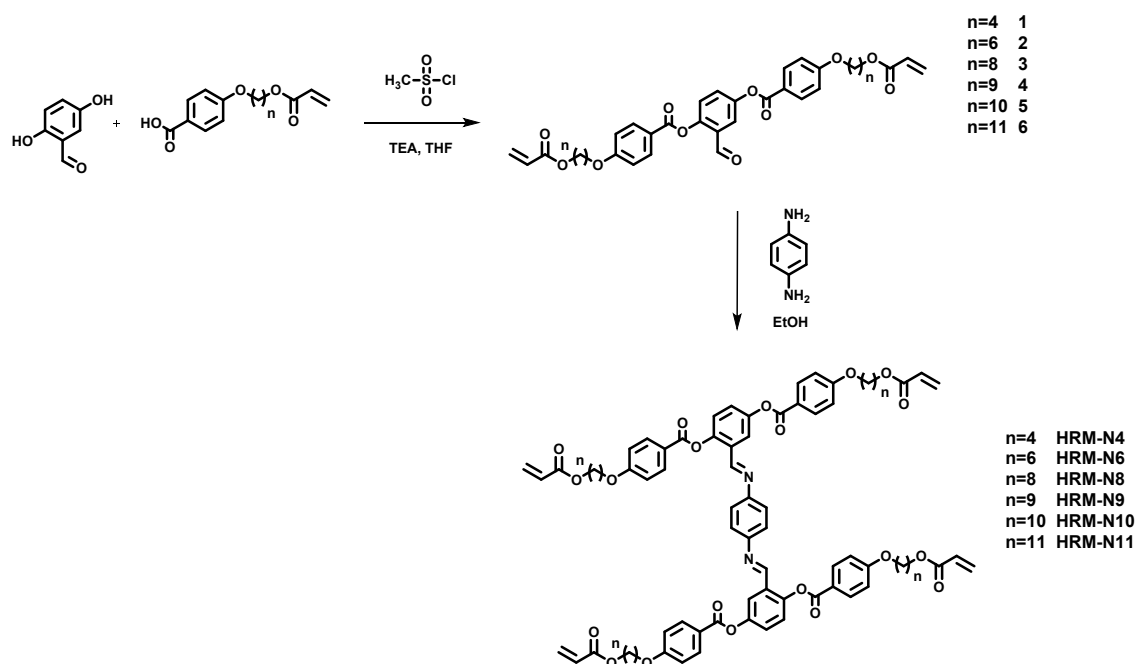

Fig. S1. Synthetic scheme of HRM molecules by alkyl chain length

## 2-formyl-1,4-phenylene bis(4-(4-(acryloyloxy)butoxy)benzoate) (1)

To a solution of 4-((4-(acryloyloxy)butyl)oxy)benzoic acid (8.42 g, 31.86 mmol) in THF (25 mL) was added triethylamine (14.13 mL, 101.36 mmol), and methanesulfonyl chloride (3.36 mL, 43.44 mmol) at 0 °C. The reaction mixture was stirred for 3h under nitrogen atmosphere. To the reaction mixture was added to 2,5-dihydroxybenzaldehyde (2.0 g, 14.48 mmol) in THF (10 mL). The reaction mixture was further stirred for 18 h at 60 °C. The reaction was quenched by water and the mixture was extracted with ethyl acetate. The organic solvent was removed under reduced pressure and the residue was purified by washing with ethanol to give a white solid (5.5 g, 60%).  $^1\text{H}$  NMR (500 MHz,  $\text{CDCl}_3$ )  $\delta$  10.21 (s, 1H), 8.19 – 8.14 (m, 4H), 7.79 (d,  $J$  = 2.9 Hz, 1H), 7.54 (dd,  $J$  = 8.8, 2.9 Hz, 1H), 7.39 (d,  $J$  = 8.8 Hz, 1H), 7.01 – 6.98 (m, 4H), 6.44 – 6.40 (m, 2H), 6.16 – 6.10 (m, 2H), 5.84 (dt,  $J$  = 10.4, 1.1 Hz, 2H), 4.27 (t,  $J$  = 5.9 Hz, 4H), 4.13 – 4.09 (m, 4H), 1.95 – 1.89 (m, 8H); UV-Vis ( $\text{CH}_2\text{Cl}_2$ , nm) 269 nm.

## HRM-N4

To a solution of compound **1** (0.5 g, 0.79 mmol) in ethanol (20 mL) was added *p*-phenylenediamine

(43 mg, 0.40 mmol). The reaction mixture was stirred for 5 h at 60 °C. After that, the reaction mixture was cooled to room temperature, and the resulting solid was filtered. The crude mixture was washed with ethanol to give a yellow solid (0.35 g, 66%). <sup>1</sup>H NMR (500 MHz, CD<sub>2</sub>Cl<sub>2</sub>) δ 8.60 (s, 2H), 8.18 – 8.15 (m, 8H), 8.05 (d, *J* = 2.8 Hz, 2H), 7.39 (dd, *J* = 8.8, 2.8 Hz, 2H), 7.33 (d, *J* = 8.8 Hz, 2H), 7.13 (s, 4H), 7.03 – 6.99 (m, 8H), 6.38 (ddd, *J* = 17.4, 4.6, 1.5 Hz, 4H), 6.13 (ddd, *J* = 17.4, 10.5, 4.7 Hz, 4H), 5.82 (ddd, *J* = 10.4, 6.3, 1.5 Hz, 4H), 4.23 (td, *J* = 6.1, 4.1 Hz, 8H), 4.11 (q, *J* = 5.8 Hz, 8H), 1.91 (m, 16H); FAB-MS *m/z*: calcd for C<sub>76</sub>H<sub>72</sub>N<sub>2</sub>O<sub>20</sub> 1332.47, found: 1333 [M+H]<sup>+</sup>; UV-Vis (CH<sub>2</sub>Cl<sub>2</sub>, nm) 268 nm, 364 nm.

## **2-formyl-1,4-phenylene bis[4-(6-acryloyloxyhexyloxy)]benzoate (2)**

To a solution of 4-(6-acryloyloxyhexyloxy)benzoic acid (9.35 g, 31.86 mmol) in THF (60 mL) was added triethylamine (14.1 mL, 101.36 mmol) and methanesulfonyl chloride (3.4 mL, 43.44 mmol) at 0 °C. The reaction mixture was stirred for 3h. To the reaction mixture was added 2,5 dihydroxybenzaldehyde (2.00 g, 14.48 mmol) in THF (10 mL) The reaction mixture was further stirred for 18 h at 65 °C. The reaction was quenched by water and the mixture was extracted with ethyl acetate. The organic solvent was removed under reduced pressure and the residue was purified by washing with ethanol to give a white solid (7.1 g, 71%). <sup>1</sup>H NMR (400 MHz, CDCl<sub>3</sub>) δ 10.21 (s, 1H), 8.16 (dd, *J* = 12.3, 8.9 Hz, 4H), 7.79 (d, *J* = 2.8 Hz, 1H), 7.54 (dd, *J* = 8.8, 2.9 Hz, 1H), 7.39 (d, *J* = 8.8 Hz, 1H), 6.99 (d, 4H), 6.41 (dd, *J* = 17.3, 1.3 Hz, 2H), 6.13 (dd, *J* = 17.3, 10.4 Hz, 2H), 5.83 (dd, *J* = 10.4, 1.2 Hz, 2H), 4.19 (t, *J* = 6.6 Hz, 4H), 4.07 (td, *J* = 6.3, 3.6 Hz, 4H), 1.86 (m, 4H), 1.77 – 1.71 (m, 4H), 1.60 – 1.45 (m, 8H); UV-Vis (CH<sub>2</sub>Cl<sub>2</sub>, nm) 269 nm.

## **HRM-N6**

To a solution of compound **2** (0.5 g, 0.73 mmol) in ethanol (15 mL) was added p-phenylenediamine (39 mg, 0.36 mmol). The reaction mixture was stirred for 6 h at 60°C. After that, the reaction mixture was cooled to room temperature, and the resulting solid was filtered. The crude mixture was washed with

ethanol to give a yellow solid (0.47 g, 89%). <sup>1</sup>H NMR (400 MHz, Methylene Chloride-d<sub>2</sub>) δ 8.60 (s, 2H), 8.16 (dd, *J* = 8.9, 2.1 Hz, 8H), 8.05 (d, *J* = 2.8 Hz, 2H), 7.39 (dd, *J* = 8.8, 2.8 Hz, 2H), 7.32 (d, *J* = 8.8 Hz, 2H), 7.00 (dd, *J* = 8.9, 2.4 Hz, 8H), 6.39 – 6.33 (m, 4H), 6.12 (ddd, *J* = 17.3, 10.4, 3.6 Hz, 4H), 5.82 – 5.78 (m, 4H), 4.16 (dt, *J* = 6.7, 3.4 Hz, 8H), 4.07 (d, *J* = 4.7 Hz, 8H), 1.84 (s, 8H), 1.74 – 1.69 (m, 8H), 1.57 – 1.45 (m, 16H); FAB-MS *m/z*: calcd for C<sub>84</sub>H<sub>88</sub>N<sub>2</sub>O<sub>20</sub> 1444.59, found: 1446 [M+H]<sup>+</sup>; UV-Vis (CH<sub>2</sub>Cl<sub>2</sub>, nm) 269 nm, 365 nm.

### 2-formyl-1,4-phenylene bis(4-((8-(acryloyloxy)octyl)oxy)benzoate) (3)

To a solution of 4-((8-(acryloyloxy)octyl)oxy)benzoic acid (0.86 g, 2.68 mmol) in THF (20 mL) was added triethylamine (1.19 mL, 8.54 mmol), and methanesulfonyl chloride (0.28 mL, 3.66 mmol) at 0 °C. The reaction mixture was stirred for 2 h under a nitrogen atmosphere. To the reaction mixture was added 2,5-dihydroxybenzaldehyde (0.17 g, 1.22 mmol) in THF (10 mL). The reaction mixture was further stirred for 6 h at 60 °C. The reaction was quenched by water and the mixture was extracted with ethyl acetate. The organic solvent was removed under reduced pressure and the residue was purified by washing with ethanol to give the white solid (0.62 g, 68%). <sup>1</sup>H NMR (400 MHz, CDCl<sub>3</sub>) δ 10.21 (s, 1H), 8.16 (dd, *J* = 12.3, 8.6 Hz, 4H), 7.79 (d, *J* = 2.8 Hz, 1H), 7.53 (dd, *J* = 8.9, 2.8 Hz, 1H), 7.39 (d, *J* = 8.8 Hz, 1H), 6.99 (t, *J* = 8.1 Hz, 4H), 6.40 (dd, *J* = 17.3, 1.9 Hz, 2H), 6.13 (dd, *J* = 17.3, 10.4 Hz, 2H), 5.82 (dd, *J* = 10.4, 1.8 Hz, 2H), 4.16 (t, *J* = 6.8 Hz, 4H), 4.08 – 4.01 (m, 4H), 1.82 (q, *J* = 7.4 Hz, 4H), 1.68 (q, *J* = 6.9 Hz, 4H), 1.56 – 1.44 (m, 8H), 1.41 – 1.37 (m, 8H); UV-Vis (CH<sub>2</sub>Cl<sub>2</sub>, nm) 269 nm.

### HRM-N8

To a solution of compound **3** (0.50 g, 0.67 mmol) in ethanol (20 mL) was added *p*-phenylenediamine (44 mg, 0.40 mmol). The reaction mixture was stirred for 6 h at 60 °C. After that, the reaction mixture was cooled to room temperature, and the resulting solid was filtered. The crude mixture was washed with ethanol to give a yellow solid (0.30 g, 57%). <sup>1</sup>H NMR (400 MHz, CD<sub>2</sub>Cl<sub>2</sub>) δ 8.60 (s, 2H), 8.15 (dd, *J* = 8.8, 2.4 Hz, 8H), 8.05 (d, *J* = 2.8 Hz, 2H), 7.39 (dd, *J* = 8.8, 2.8 Hz, 2H), 7.32 (d, *J* = 8.8 Hz, 2H), 7.12 (s, 4H), 7.00 (dd, *J* = 9.0, 2.6 Hz, 8H), 6.35 (ddd, *J* = 17.3, 3.1, 1.6 Hz, 4H), 6.11 (ddd, *J* =

17.3, 10.4, 3.2 Hz, 4H), 5.80 (ddd,  $J$  = 10.4, 3.6, 1.8 Hz, 4H), 4.13 (td,  $J$  = 6.7, 3.1 Hz, 8H), 4.06 (q,  $J$  = 5.9 Hz, 8H), 1.82 (t,  $J$  = 8.0 Hz, 8H), 1.67 (m, 8H), 1.52 – 1.36 (m, 32H); FAB-MS  $m/z$ : calcd for  $C_{92}H_{104}N_2O_{20}$  1556.72, found: 1558  $[M+H]^+$ ; UV-Vis ( $CH_2Cl_2$ , nm) 269 nm, 365 nm.

#### **2-formyl-1,4-phenylene bis(4-((9-(acryloyloxy)nonyl)oxy)benzoate) (4)**

To a solution of 4-((9-(acryloyloxy)nonyl)oxy)benzoic acid (2.0 g, 5.98 mmol) in THF (20 mL) was added triethylamine (2.65 mL, 19.03 mmol), and methanesulfonyl chloride (0.63 mL, 8.15 mmol) at 0 °C. The reaction mixture was stirred for 3 h under a nitrogen atmosphere. To the reaction mixture was added 2,5-dihydroxybenzaldehyde (0.38 g, 2.72 mmol) in THF (10 mL). The reaction mixture was further stirred for 12 h at 25 °C. The reaction was quenched by water and the mixture was extracted with ethyl acetate. The organic solvent was removed under reduced pressure and the residue was purified by washing with ethanol to give the white solid (0.46 g, 80%).  $^1H$  NMR (400 MHz,  $CDCl_3$ )  $\delta$  10.22 (s, 1H), 8.16 (dd,  $J$  = 12.3, 8.6 Hz, 4H), 7.79 (d,  $J$  = 2.8 Hz, 1H), 7.53 (dd,  $J$  = 8.9, 2.8 Hz, 1H), 7.39 (d,  $J$  = 8.8 Hz, 1H), 6.99 (t,  $J$  = 8.1 Hz, 4H), 6.40 (dd,  $J$  = 17.3, 1.9 Hz, 2H), 6.13 (dd,  $J$  = 17.3, 10.4 Hz, 2H), 5.81 (dd,  $J$  = 10.4, 1.8 Hz, 2H), 4.16 (t,  $J$  = 6.8 Hz, 4H), 4.06 (m, 4H), 1.83 (m, 4H), 1.68 (m, 4H), 1.56 – 1.44 (m, 4H), 1.36 (m, 16H); UV-Vis ( $CH_2Cl_2$ , nm) 269 nm.

#### **HRM-N9**

To a solution of compound **4** (0.50 g, 0.65 mmol) in ethanol (20 mL) was added *p*-phenylenediamine (42 mg, 0.39 mmol). The reaction mixture was stirred for 6 h at 60 °C. After that, the reaction mixture was cooled to room temperature, and the resulting solid was filtered. The crude mixture was washed with ethanol to give a yellow solid (0.21 g, 40%).  $^1H$  NMR (400 MHz,  $CD_2Cl_2$ )  $\delta$  8.61 (s, 2H), 8.16 (dd,  $J$  = 8.8, 2.4 Hz, 8H), 8.05 (d,  $J$  = 2.8 Hz, 2H), 7.39 (dd,  $J$  = 8.8, 2.8 Hz, 2H), 7.32 (d,  $J$  = 8.8 Hz, 2H), 7.13 (s, 4H), 7.00 (dd,  $J$  = 9.0, 2.6 Hz, 8H), 6.35 (ddd,  $J$  = 17.3, 3.1, 1.6 Hz, 4H), 6.11 (ddd,  $J$  = 17.3, 10.4, 3.2 Hz, 4H), 5.80 (ddd,  $J$  = 10.4, 3.6, 1.8 Hz, 4H), 4.13 (m, 8H), 4.06 (m, 8H), 1.82 (m, 8H), 1.67 (m, 8H), 1.48 – 1.36 (m, 40H); FAB-MS  $m/z$ : calcd for  $C_{96}H_{112}N_2O_{20}$  1612.78, found: 1613

[M+H]<sup>+</sup>; UV-Vis (CH<sub>2</sub>Cl<sub>2</sub>, nm) 269 nm, 365 nm.

### 2-formyl-1,4-phenylene bis(4-((10-(acryloyloxy)decyl)oxy)benzoate) (**5**)

To a solution of 4-((10-(acryloyloxy)decyl)oxy)benzoic acid (0.55 g, 1.59 mmol) in THF (20 mL) was added triethylamine (0.7 mL, 5.07 mmol), and methanesulfonyl chloride (0.17 mL, 2.17 mmol) at 0 °C. The reaction mixture was stirred for 3 h under a nitrogen atmosphere. To the reaction mixture was added to 2,5-dihydroxybenzaldehyde (0.10 g, 0.72 mmol) in THF (5 mL). The reaction mixture was further stirred for 18 h at 60 °C. The reaction was quenched by water and the mixture was extracted with ethyl acetate. The organic solvent was removed under reduced pressure and the residue was purified by washing with ethanol to give the white solid (0.45 g, 78%). <sup>1</sup>H NMR (400 MHz, CDCl<sub>3</sub>) δ 10.24 (s, 1H), 8.18 (dd, *J* = 12.4, 8.5 Hz, 4H), 7.81 (d, *J* = 2.8 Hz, 1H), 7.56 (dd, *J* = 9.0, 2.8 Hz, 1H), 7.41 (d, *J* = 8.9 Hz, 1H), 7.02 (t, *J* = 8.1 Hz, 4H), 6.43 (d, *J* = 17.4 Hz, 2H), 6.15 (dd, *J* = 17.3, 10.4 Hz, 2H), 5.84 (d, *J* = 10.4 Hz, 2H), 4.18 (t, *J* = 6.8 Hz, 4H), 4.12 – 4.01 (m, 4H), 1.89 – 1.82 (m, 4H), 1.74 – 1.65 (m, 4H), 1.51 (t, *J* = 7.6 Hz, 4H), 1.43 – 1.30 (m, 20H); UV-Vis (CH<sub>2</sub>Cl<sub>2</sub>, nm) 269 nm.

### HRM-N10

To a solution of compound **5** (0.2 g, 0.25 mmol) in ethanol (15 mL) was added *p*-phenylenediamine (16 mg, 0.15 mmol). The reaction mixture was stirred for 5 h at 60 °C. After that, the reaction mixture was cooled to room temperature, and the resulting solid was filtered. The crude mixture was washed with ethanol to give a yellow solid (0.15 g, 72%). <sup>1</sup>H NMR (500 MHz, CD<sub>2</sub>Cl<sub>2</sub>) δ 8.60 (s, 2H), 8.17 – 8.13 (m, 8H), 8.05 (d, *J* = 2.9 Hz, 2H), 7.39 (dd, *J* = 8.8, 2.9 Hz, 2H), 7.32 (d, *J* = 8.7 Hz, 2H), 7.12 (d, *J* = 2.5 Hz, 4H), 7.02 – 6.98 (m, 8H), 6.35 (ddd, *J* = 17.4, 3.2, 1.6 Hz, 4H), 6.11 (ddd, *J* = 17.3, 10.4, 3.5 Hz, 4H), 5.80 (ddd, *J* = 10.4, 3.7, 1.6 Hz, 4H), 4.12 (td, *J* = 6.7, 3.9 Hz, 8H), 4.06 (q, *J* = 6.4 Hz, 8H), 1.82 (ddt, *J* = 10.1, 6.5, 3.3 Hz, 8H), 1.69 – 1.62 (m, 8H), 1.50 – 1.44 (m, 8H), 1.39 – 1.30 (m, 40H); FAB-MS *m/z*: calcd for C<sub>100</sub>H<sub>120</sub>N<sub>2</sub>O<sub>20</sub> 1668.84, found: 1670 [M+H]<sup>+</sup>; UV-Vis (CH<sub>2</sub>Cl<sub>2</sub>, nm) 269 nm, 365 nm.

## 2. Retardation and optical property of the retarders and the HRM molecules

Table S1. Birefringence of the retarders made from pure RRM and RRM-HRM mixtures.

| Alkyl chain length | Name    | Thickness ( $\mu\text{m}$ ) | $\Delta n$ |
|--------------------|---------|-----------------------------|------------|
| -                  | RRM     | 1.03                        | 0.125      |
| 4                  | HRM-N4  | 1.04                        | 0.163      |
| 6                  | HRM-N6  | 1.05                        | 0.118      |
| 8                  | HRM-N8  | 1.07                        | 0.103      |
| 9                  | HRM-N9  | 1.05                        | 0.115      |
| 10                 | HRM-N10 | 1.06                        | 0.127      |
| 11                 | HRM-N11 | 1.05                        | 0.093      |

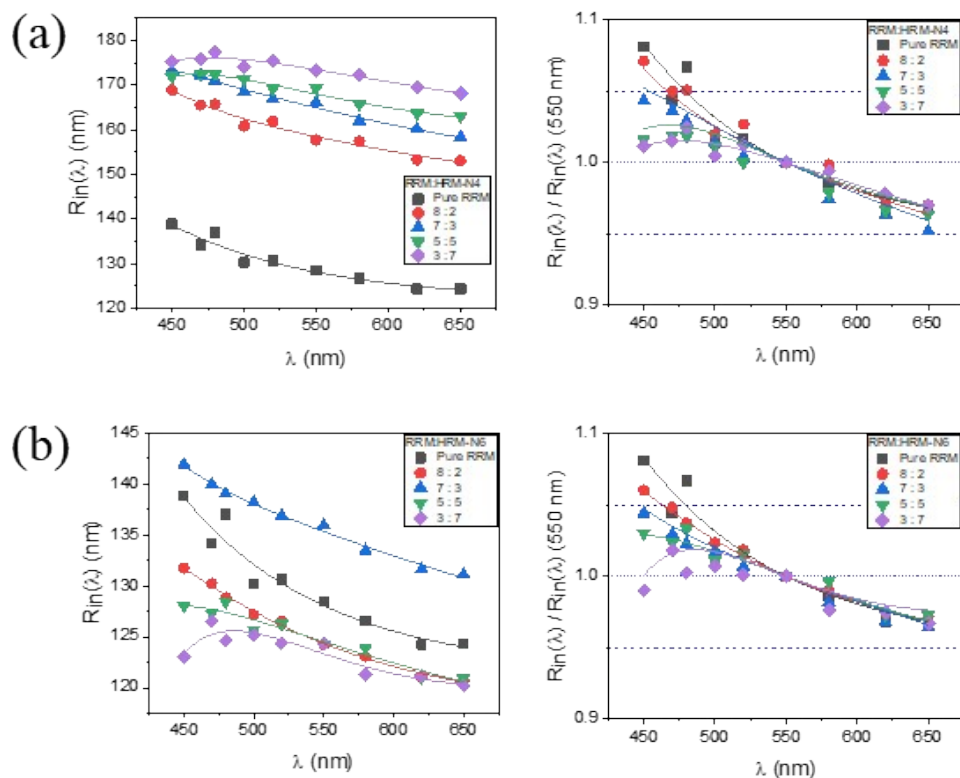

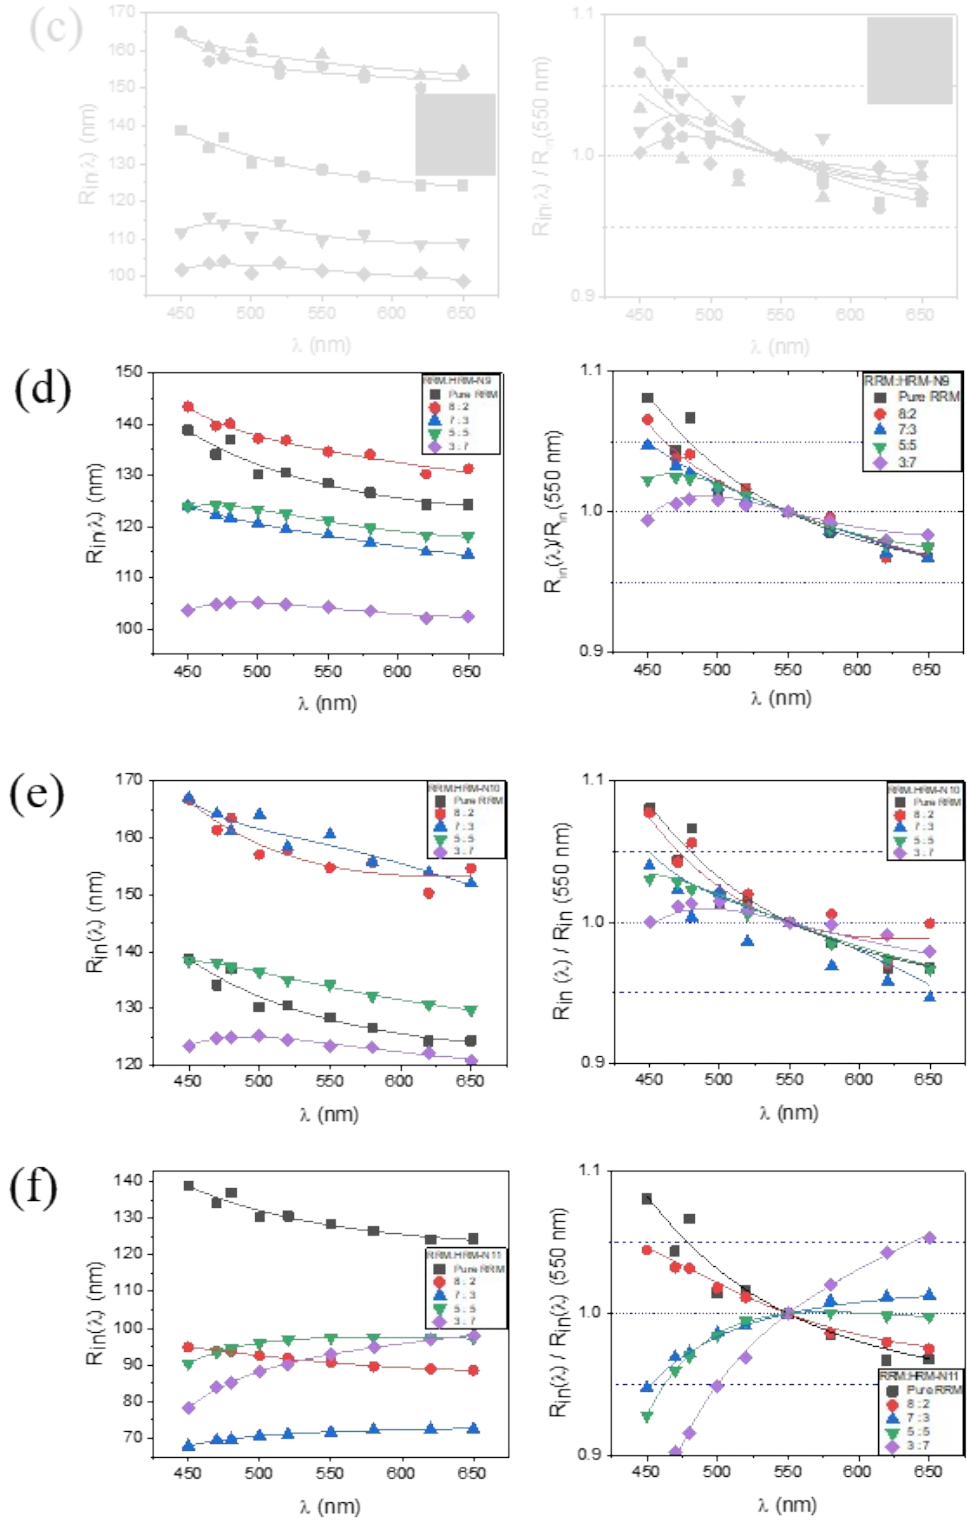

Fig. S2. In-plane retardation  $R_{in}(\lambda)$  and normalized retardation  $R_{in}(\lambda)/R_{in}(550 \text{ nm})$  of the retarder made from pure RRM and RRM-HRM mixtures. HRM molecules of (a) N=4, (b) N=6, (c) N=8, (d) N=9 (e) N=10, and (f) N=11 were mixed with RRM.



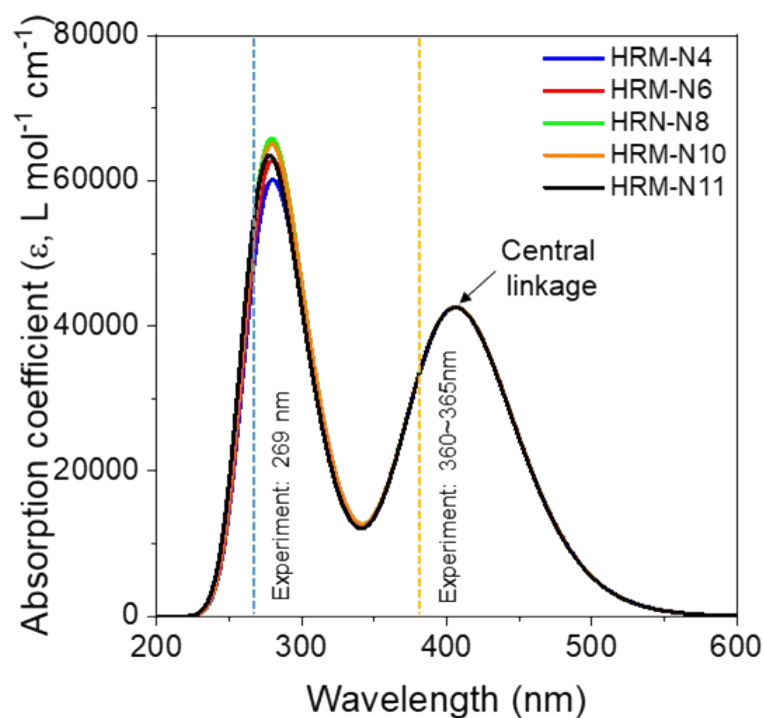

Fig. S3. Theoretically calculated UV-Vis absorption coefficient of the HRM molecules for comparing experimental data.

Table S2. The percentage errors (%) between calculated and experimental values of UV-Vis. absorption intensity.

| Alkyl chain length | Name    | Calculation data     |                      | Experiment data      |                      | Error (%)            |                      |
|--------------------|---------|----------------------|----------------------|----------------------|----------------------|----------------------|----------------------|
|                    |         | 1 <sup>st</sup> peak | 2 <sup>nd</sup> peak | 1 <sup>st</sup> peak | 2 <sup>nd</sup> peak | 1 <sup>st</sup> peak | 2 <sup>nd</sup> peak |
| 4                  | HRM-N4  | 279.6                | 405.6                | 269                  | 360                  | 3.94                 | 12.67                |
| 6                  | HRM-N6  | 279.6                | 405.6                | 269                  | 365                  | 3.94                 | 11.12                |
| 8                  | HRM-N8  | 279.6                | 405.6                | 269                  | 365                  | 3.94                 | 11.12                |
| 10                 | HRM-N10 | 279.6                | 405.6                | 269                  | 365                  | 3.94                 | 11.12                |
| 11                 | HRM-N11 | 277.2                | 405.6                | 269                  | 364                  | 3.05                 | 11.43                |

### 3. Detailed simulation results of application demonstration

Table S3. Simulation parameters of each layer which were used for the optical simulations.

| Material | $n_x-n_y$                  |                            |                            | $n_x-n_z$                  |                            |                            | $n_y-n_z$                  |                            |                            | Thickness ( $\mu m$ ) |
|----------|----------------------------|----------------------------|----------------------------|----------------------------|----------------------------|----------------------------|----------------------------|----------------------------|----------------------------|-----------------------|
|          | $\lambda = 450 \text{ nm}$ | $\lambda = 550 \text{ nm}$ | $\lambda = 650 \text{ nm}$ | $\lambda = 450 \text{ nm}$ | $\lambda = 550 \text{ nm}$ | $\lambda = 650 \text{ nm}$ | $\lambda = 450 \text{ nm}$ | $\lambda = 550 \text{ nm}$ | $\lambda = 650 \text{ nm}$ |                       |
| RRM      | 0.135                      | 0.125                      | 0.119                      | 0.144                      | 0.134                      | 0.127                      | 0.009                      | 0.009                      | 0.008                      | 1.1                   |
| WRS      | 0.003                      | 0.003                      | 0.003                      | 0.003                      | 0.003                      | 0.004                      | 0.000                      | 0.001                      | 0.001                      | 46.5                  |
| HRM-N11  | 0.086                      | 0.093                      | 0.092                      | 0.072                      | 0.078                      | 0.077                      | -0.014                     | -0.015                     | -0.015                     | 1.48                  |
| IPS LC   | 0.122                      | 0.100                      | 0.095                      | 0.122                      | 0.100                      | 0.095                      | 0.000                      | 0.000                      | 0.000                      | 2.75                  |
| HRM-N4   | 0.165                      | 0.163                      | 0.156                      | 0.109                      | 0.108                      | 0.103                      | -0.056                     | -0.055                     | -0.053                     | 1.69                  |

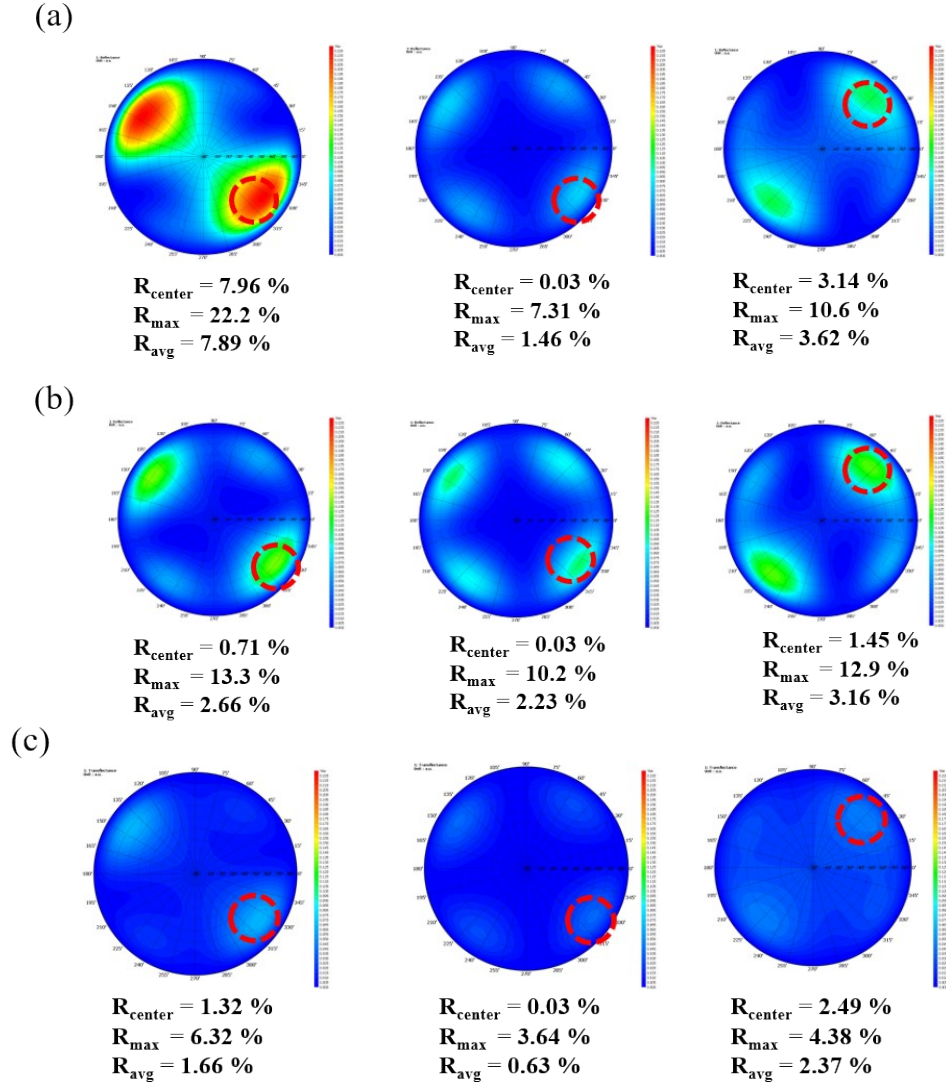

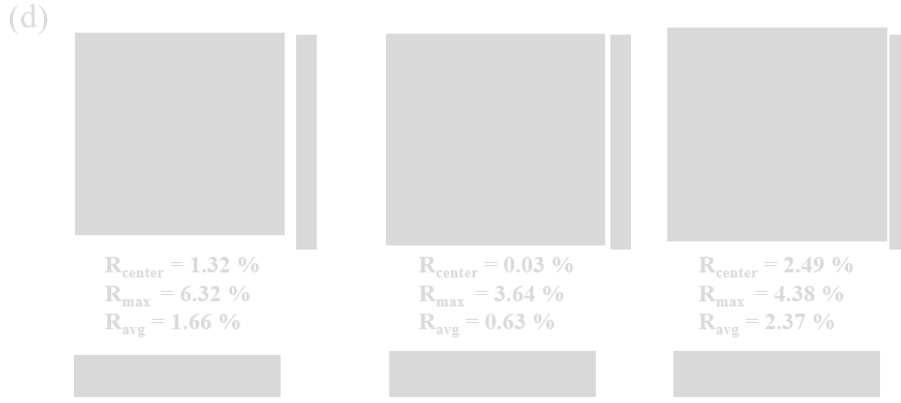

Fig. S4. Optical simulation results of the reflectance from the metal layer of the OLED display where the circular polarizer is attached. (a) Pure RRM, (b) WRS, (c) 50 wt% HRM-N11 and (d) 50 wt% HRM-N4 were used as a quarter waveplate. The red dotted circle corresponds to the viewing angle with the  $R_{\text{max}}$  value.

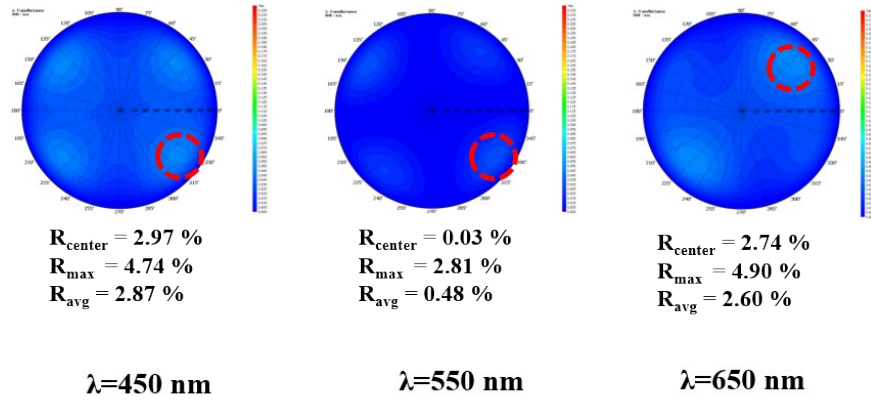

Fig. S5. Optical simulation results of the reflectance from the metal layer of the OLED display where the circular polarizer is attached. 90 wt% HRM-N6 was used as a quarter waveplate. The red dotted circle corresponds to the viewing angle with the  $R_{\text{max}}$  value.  $\alpha_{90 - \text{HRM} - \text{N6}}$ ,  $\beta_{90 - \text{HRM} - \text{N6}}$  and  $\text{NZ}_{90 - \text{HRM} - \text{N6}}$  were 0.97, 0.98 and 0.69, respectively.
